# Supplementary material
Source: PubMed Central journal article supplement (PMC3838168)
Supplement: JVI.01160-13_zjv999098337so1.pdf [file JVI.01160-13_zjv999098337so1.pdf]

**Supplementary Table 1. YFV-Specific T cell Epitopes<sup>a</sup>**

| <b>Protein</b> | <b>Range</b>   | <b>HLA-DRB1</b> | <b>Amino acid sequence</b> | <b>Positive Subjects</b>    |
|----------------|----------------|-----------------|----------------------------|-----------------------------|
| <b>Cap</b>     | <b>49-65</b>   | <b>01:01</b>    | <b>FFFLFNILTGKKIT AHL</b>  | <b>5 of 5<sup>b</sup></b>   |
| Cap            | 67-83          | 01:01           | RLWKMLDPRQGLAVLRK          | 4 of 5                      |
| Cap            | 79-95          | 07:01           | AVLRKVKRVVASLMRGL          | 3 of 6                      |
| Cap            | 25-41          | 11:01           | NKIKQKTKQIGNRPGPS          | 3 of 6                      |
| <b>Cap</b>     | <b>73-89</b>   | <b>11:01</b>    | <b>DPRQGLAVLRKV KRVVA</b>  | <b>4 of 6<sup>b</sup></b>   |
| Cap            | 85-102         | 11:01           | KRVVASLMRGLSSRKRR          | 3 of 6                      |
| <b>PrM</b>     | <b>121-137</b> | <b>01:01</b>    | <b>IERWFVRNPF FAVTALT</b>  | <b>5 of 5</b>               |
| PrM            | 133-149        | 01:01           | VTALTIAYLVGSNMTQR          | 3 of 5                      |
| PrM            | 61-77          | 04:01           | IDCWCYGVENVRVAYGK          | 2 of 3                      |
| PrM            | 61-77          | 07:01           | IDCWCYGVENVRVAYGK          | 2 of 6                      |
| Env            | 115-131        | 01:01           | ACAKFTCAKSMSLFEVD          | 2 of 5                      |
| Env            | 157-173        | 01:01           | KTLKFDALSGSQEVEFI          | 3 of 5                      |
| Env            | 271-287        | 01:01           | NNLYKLHGGHVSCRVKL          | 3 of 5                      |
| Env            | 331-347        | 01:01           | RIPVIVADDLTAAINKG          | 3 of 5                      |
| <b>Env</b>     | <b>43-59</b>   | <b>03:01</b>    | <b>ISLETVAIDRPAEVRKV</b>   | <b>10 of 10<sup>b</sup></b> |
| <b>Env</b>     | <b>331-347</b> | <b>03:01</b>    | <b>RIPVIVADDLTAAINKG</b>   | <b>9 of 10<sup>b</sup></b>  |
| <b>Env</b>     | <b>43-59</b>   | <b>04:01</b>    | <b>ISLETVAIDRPAEVRKV</b>   | <b>3 of 3</b>               |
| <b>Env</b>     | <b>121-137</b> | <b>04:01</b>    | <b>CAKSMSLFEVDQTKIQY</b>   | <b>3 of 3<sup>b</sup></b>   |
| <b>Env</b>     | <b>199-215</b> | <b>04:01</b>    | <b>ETESWIVDRQWAQDLTL</b>   | <b>3 of 3</b>               |
| Env            | 241-257        | 04:01           | TIRVLALGNQEGSLKTA          | 2 of 3                      |
| <b>Env</b>     | <b>301-317</b> | <b>04:01</b>    | <b>TDKMFFVKNPDTGHGT</b>    | <b>3 of 3</b>               |
| Env            | 331-347        | 04:01           | RIPVIVADDLTAAINKG          | 2 of 3                      |
| Env            | 343-359        | 04:01           | AINKGILVTVNPIASTN          | 3 of 3                      |
| <b>Env</b>     | <b>385-401</b> | <b>04:01</b>    | <b>LTYQWHKEGSSIGKLFT</b>   | <b>3 of 3</b>               |
| <b>Env</b>     | <b>241-257</b> | <b>04:04</b>    | <b>TIRVLALGNQEGSLKTA</b>   | <b>3 of 3</b>               |
| <b>Env</b>     | <b>313-329</b> | <b>04:04</b>    | <b>TGHGTVVMQVKVSKGAP</b>   | <b>3 of 3<sup>b</sup></b>   |
| Env            | 343-359        | 04:04           | AINKGILVTVNPIASTN          | 2 of 3                      |
| <b>Env</b>     | <b>415-431</b> | <b>07:01</b>    | <b>DTAWDFSSAGGF FTSVG</b>  | <b>4 of 6<sup>b</sup></b>   |
| Env            | 109-125        | 11:01           | GKGSIVACAKFTCAKSM          | 5 of 6                      |
| Env            | 127-143        | 11:01           | LFEVDQTKIQYVIRAQL          | 3 of 6                      |
| Env            | 223-239        | 11:01           | GVWREMHHLVEFEPHA           | 4 of 6                      |
| Env            | 283-299        | 11:01           | CRVKLSALT LKGTSYKI         | 2 of 6                      |
| <b>Env</b>     | <b>373-389</b> | <b>11:01</b>    | <b>DSYIIVGRGDSRLTYQW</b>   | <b>6 of 6<sup>b</sup></b>   |
| Env            | 421-437        | 11:01           | SSAGGF FTSVGKGIHTV         | 4 of 6                      |
| <b>Env</b>     | <b>457-473</b> | <b>15:01</b>    | <b>MGAVLIWVGINTRNMTM</b>   | <b>5 of 5<sup>b</sup></b>   |
| NS1            | 31-47          | 01:01           | KYSYYPEDPVK LASIVK         | 4 of 5                      |
| NS1            | 151-167        | 01:01           | NSFQIEEFGTGVFTTRV          | 3 of 5                      |
| NS1            | 7-23           | 03:01           | NFGKRELKCGDGIFIFR          | 4 of 10                     |

|             |                |              |                          |                             |
|-------------|----------------|--------------|--------------------------|-----------------------------|
| <b>NS1</b>  | <b>85-101</b>  | <b>03:01</b> | <b>DISVVVQDPKNVYQRGT</b> | <b>10 of 10<sup>b</sup></b> |
| NS1         | 127-143        | 03:01        | GRKNGSFIIDGKSRKEC        | 9 of 10                     |
| NS1         | 163-179        | 03:01        | FTTRVYMDAVFEYTIDC        | 6 of 10                     |
| NS1         | 175-191        | 04:01        | YTIDCDGSILGAAVNGK        | 3 of 3                      |
| NS1         | 55-71          | 04:04        | CGLNSVDSLEHEMWRSR        | 3 of 3                      |
| NS1         | 61-77          | 07:01        | DSLEHEMWRSRADEINA        | 6 of 6                      |
| <b>NS1</b>  | <b>109-125</b> | <b>07:01</b> | <b>DGLQYGWKTWGKNLVFS</b> | <b>6 of 6</b>               |
| NS1         | 223-239        | 07:01        | ECEWPLTHTIGTSVEES        | 2 of 6                      |
| NS2a        | 67-83          | 01:01        | NGGDAMYMALIAAFSIR        | 3 of 5                      |
| <b>NS2a</b> | <b>115-131</b> | <b>01:01</b> | <b>LGGVMGGLWKYLNAVSL</b> | <b>5 of 5<sup>b</sup></b>   |
| NS2a        | 13-29          | 03:01        | MMIAMEVVLRRKRQGPQ        | 5 of 10                     |
| NS2a        | 145-161        | 04:04        | SNTILPLMALLTPVTMA        | 2 of 3                      |
| NS2a        | 49-65          | 07:01        | LDLLKLTVAVGLHFHEM        | 5 of 6                      |
| NS2a        | 67-83          | 07:01        | NGGDAMYMALIAAFSIR        | 2 of 6                      |
| NS2a        | 115-131        | 07:01        | LGGVMGGLWKYLNAVSL        | 4 of 6                      |
| NS2a        | 13-29          | 11:01        | MMIAMEVVLRRKRQGPQ        | 4 of 6                      |
| NS2b        | 79-95          | 01:01        | SEQGEFKLLSEEKVPWD        | 2 of 5                      |
| NS2b        | 19-35          | 15:01        | GLAFQEMENFLGPIAVG        | 5 of 5                      |
| <b>NS3</b>  | <b>49-65</b>   | <b>01:01</b> | <b>HTMWHVTRGAFVLRNGK</b> | <b>5 of 5<sup>b</sup></b>   |
| NS3         | 91-107         | 01:01        | WDGEEEVQLIAAVPGKN        | 3 of 5                      |
| NS3         | 145-161        | 01:01        | RNGEVIGLYGNGILVGD        | 2 of 5                      |
| <b>NS3</b>  | <b>265-281</b> | <b>01:01</b> | <b>MCHATLTYRMLEPTRVV</b> | <b>5 of 5</b>               |
| <b>NS3</b>  | <b>409-425</b> | <b>01:01</b> | <b>FILATDIAEMGANLCVE</b> | <b>5 of 5</b>               |
| NS3         | 151-167        | 03:01        | GLYNGILVGDNSFVSA         | 5 of 10                     |
| NS3         | 229-245        | 03:01        | TRVVLSEMKEAFHGLDV        | 7 of 10                     |
| NS3         | 283-299        | 03:01        | WEVIIMDEAHFLDPASI        | 8 of 10                     |
| <b>NS3</b>  | <b>355-371</b> | <b>03:01</b> | <b>WILADKRPTAWFLPSIR</b> | <b>9 of 10<sup>b</sup></b>  |
| NS3         | 151-167        | 04:01        | GLYNGILVGDNSFVSA         | 3 of 3                      |
| NS3         | 367-383        | 04:01        | LPSIRAANVMAASLRKA        | 2 of 3                      |
| <b>NS3</b>  | <b>475-491</b> | <b>04:01</b> | <b>SYYYSEPTSENNAHHVC</b> | <b>3 of 3<sup>b</sup></b>   |
| NS3         | 1-17           | 04:04        | SGDVLWDIPTPKIIEEC        | 2 of 3                      |
| NS3         | 91-107         | 04:04        | WDGEEEVQLIAAVPGKN        | 2 of 3                      |
| NS3         | 367-383        | 04:04        | LPSIRAANVMAASLRKA        | 3 of 3                      |
| NS3         | 409-425        | 04:04        | FILATDIAEMGANLCVE        | 3 of 3                      |
| NS3         | 19-35          | 07:01        | HLEDGIYGIFQSTFLGA        | 3 of 6                      |
| <b>NS3</b>  | <b>49-65</b>   | <b>07:01</b> | <b>HTMWHVTRGAFVLRNGK</b> | <b>5 of 6</b>               |
| NS3         | 349-365        | 11:01        | WNTGHDWILADKRPTAW        | 4 of 6                      |
| NS3         | 361-377        | 11:01        | RPTAWFLPSIRAANVMA        | 5 of 6                      |
| <b>NS3</b>  | <b>145-161</b> | <b>15:01</b> | <b>RNGEVIGLYGNGILVGD</b> | <b>5 of 5<sup>b</sup></b>   |
| NS4a        | 67-83          | 01:01        | MVIFFMSPKGISRMSMA        | 2 of 5                      |
| NS4a        | 67-83          | 11:01        | MVIFFMSPKGISRMSMA        | 4 of 6                      |

|            |                |              |                           |                           |
|------------|----------------|--------------|---------------------------|---------------------------|
| NS4b       | 121-137        | 01:01        | SLILPGIKAQQSKLAQR         | 4 of 5                    |
| NS4b       | 187-203        | 01:01        | CRTPFSLAEGIVLASAA         | 3 of 5                    |
| NS4b       | 37-53          | 04:01        | GAAWTVYVGIVTMLS PM        | 2 of 3                    |
| NS4b       | 67-83          | 04:01        | LSGIAQSASVLSFMDKG         | 3 of 3                    |
| NS4b       | 67-83          | 04:04        | LSGIAQSASVLSFMDKG         | 2 of 3                    |
| NS4b       | 97-113         | 07:01        | LVSGWNSITVMPLLCGI         | 2 of 6                    |
| NS4b       | 234-250        | 11:01        | AFVGVMYNLWKMKTGRR         | 4 of 6                    |
| NS5        | 67-83          | 01:01        | ERGYVKLEGRVIDLGCG         | 4 of 5                    |
| NS5        | 127-143        | 01:01        | KDKTDIHRLEPVKCDTL         | 4 of 5                    |
| NS5        | 469-485        | 01:01        | AKGSRAIWYMWLGARYL         | 4 of 5                    |
| <b>NS5</b> | <b>637-653</b> | <b>01:01</b> | <b>QDCDESVLTRLEAWLTE</b>  | <b>4 of 5</b>             |
| NS5        | 7-23           | 04:01        | TLGEVWKRELNLLDKRQ         | 3 of 3                    |
| NS5        | 397-413        | 04:01        | KEEFI AKVRSHAAIGAY        | 2 of 3                    |
| NS5        | 529-545        | 04:01        | GGFYADDTAGWDTRITE         | 2 of 3                    |
| NS5        | 757-773        | 04:01        | CLSKAYANMWSLMYFHK         | 2 of 3                    |
| NS5        | 865-881        | 04:01        | SHIHLVIHRIRTLIGQE         | 2 of 3                    |
| <b>NS5</b> | <b>667-683</b> | <b>04:04</b> | <b>DDCVVRPIDDRFGLALS</b>  | <b>2 of 3<sup>b</sup></b> |
| <b>NS5</b> | <b>865-881</b> | <b>04:04</b> | <b>SHIHLVIHRIRTLIGQE</b>  | <b>3 of 3</b>             |
| NS5        | 25-41          | 07:01        | ELYKRTDIVEVDRDTAR         | 3 of 6                    |
| NS5        | 337-353        | 07:01        | EEVTRMAMTDTPFGQQ          | 2 of 6                    |
| <b>NS5</b> | <b>481-497</b> | <b>07:01</b> | <b>GARYLEFEALGFLNEDH</b>  | <b>3 of 6</b>             |
| <b>NS5</b> | <b>619-635</b> | <b>07:01</b> | <b>VQLIRMAEAEMVIHHQH</b>  | <b>3 of 6<sup>b</sup></b> |
| <b>NS5</b> | <b>187-203</b> | <b>11:01</b> | <b>YMPDVLEKLELLQRRFG</b>  | <b>5 of 6<sup>b</sup></b> |
| <b>NS5</b> | <b>235-251</b> | <b>11:01</b> | <b>QTSRLLMRRMRRPTGKV</b>  | <b>5 of 6<sup>b</sup></b> |
| NS5        | 379-395        | 11:01        | NRWLFRLHAREKNPRLC         | 2 of 6                    |
| NS5        | 397-413        | 11:01        | KEEFI AKVRSHAAIGAY        | 4 of 6                    |
| NS5        | 445-461        | 11:01        | QGRCTCVYNMMGKREK          | 4 of 6                    |
| NS5        | 457-473        | 11:01        | GKREKKLSEFGKAKGSR         | 2 of 6                    |
| NS5        | 511-527        | 11:01        | IGLQYLG YVIRDLAAMD        | 4 of 6                    |
| NS5        | 589-605        | 11:01        | KAYMDVISRRDQRGSGQ         | 4 of 6                    |
| NS5        | 325-341        | 15:01        | VIKILTYPWDRIEEVTR         | 4 of 5                    |
| <b>NS5</b> | <b>367-383</b> | <b>15:01</b> | <b>PPAGTRKIMKV VNRWLF</b> | <b>4 of 5<sup>b</sup></b> |
| <b>NS5</b> | <b>547-563</b> | <b>15:01</b> | <b>DLDDQEILNYMSPHHK</b>   | <b>3 of 5<sup>b</sup></b> |

<sup>a</sup> Epitopes that were chosen as suitable for ex vivo tetramer analysis are listed in boldface

<sup>b</sup> Preferred epitopes for ex vivo analysis

**Supplementary Table 2. ELISPOT and Tetramer Frequencies of**

**YFV-Specific T cells**

| <b>Subject</b> | <b>HLA type</b> | <b>Epitope</b> | <b>ELISPOT<sup>a</sup></b> | <b>Tetramer<sup>a</sup></b> |
|----------------|-----------------|----------------|----------------------------|-----------------------------|
| #008           | DRB1*03:01      | Env 43-59      | 48                         | 18                          |
| #008           | DRB1*03:01      | NS3 355-371    | 60                         | 23                          |
| #036           | DRB1*03:01      | Env 43-59      | 68                         | 97                          |
| #036           | DRB1*03:01      | NS1 85-101     | 60                         | 60                          |
| #036           | DRB1*03:01      | NS3 355-371    | 120                        | 115                         |

<sup>a</sup>Frequencies are expressed as cells per million.
